# Supplementary material for: Mechanical properties of electrochemically synthesised metal–organic framework thin films
Source: Royal Society of Chemistry journal article supplement (doi:10.1039/c3tc31039f), 2013-01-01
Supplement: c3tc31039f.pdf [file c3tc31039f.pdf]

## Supporting info

**Table S1** Optimized synthesis conditions of the MOF-coatings

|                                               | Cu(CHDA) | Cu <sub>3</sub> (BTC) <sub>2</sub> | Cu(INA) <sub>2</sub> |
|-----------------------------------------------|----------|------------------------------------|----------------------|
| <b>Time (Sec.)</b>                            | 15       | 180                                | 60                   |
| <b>Voltage (V)</b>                            | 30       | 2.5                                | 2.5                  |
| <b>Frequency (Hz)</b>                         | 0.5      | 0                                  | 0                    |
| <b>Solvent (ml)<br/>EtOH : H<sub>2</sub>O</b> | 75 : 25  | 50 : 50                            | 50 : 50              |

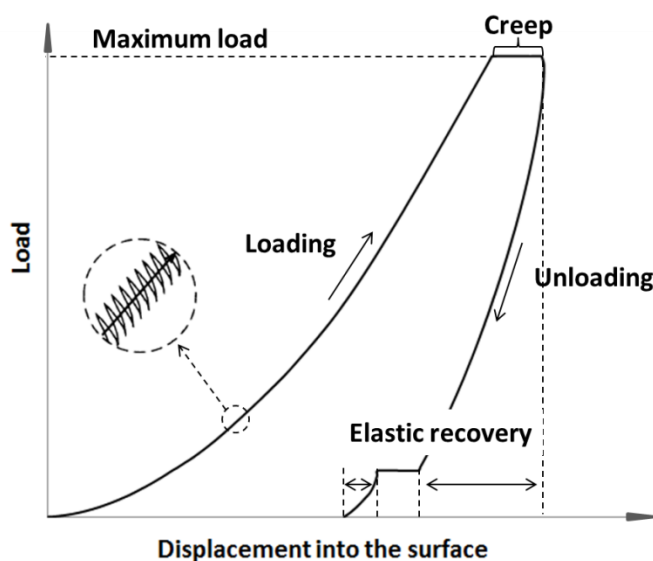

**Figure S1.** A typical load-displacement curve. On the unloading curve, the horizontal segment at 90% unload corresponds to thermal drift measurement.

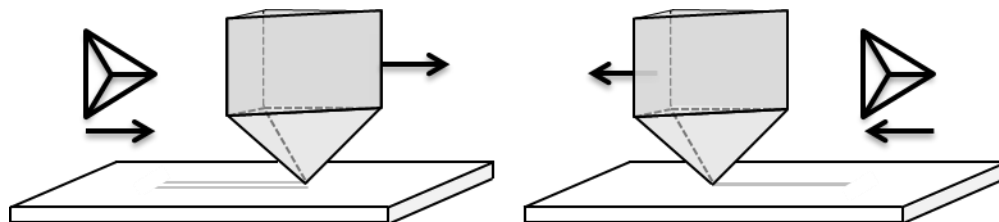

**Figure S2** The scratch movements depending on the geometry of the indenter, with either the sharp tip (left, denoted as 0°) or blunt side (right, at 180°) facing in the scratching direction.

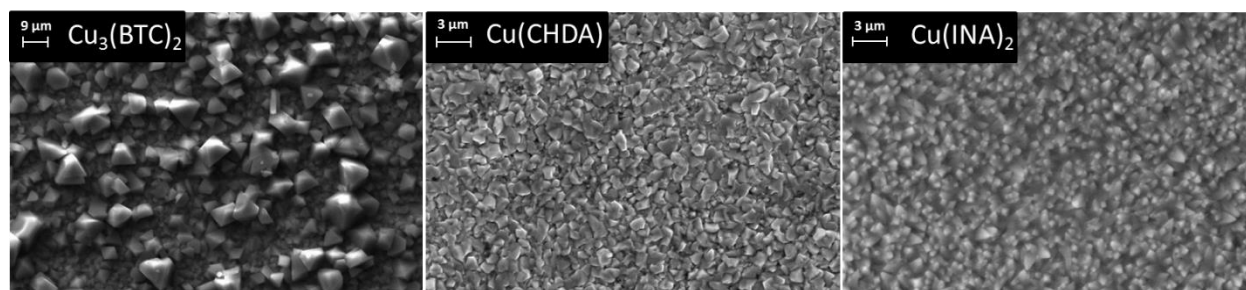

**Figure S3** Details of the electrochemical growth of  $\text{Cu}_3(\text{BTC})_2$ ,  $\text{Cu}(\text{CHDA})$  and  $\text{Cu}(\text{INA})_2$  on copper anodes.

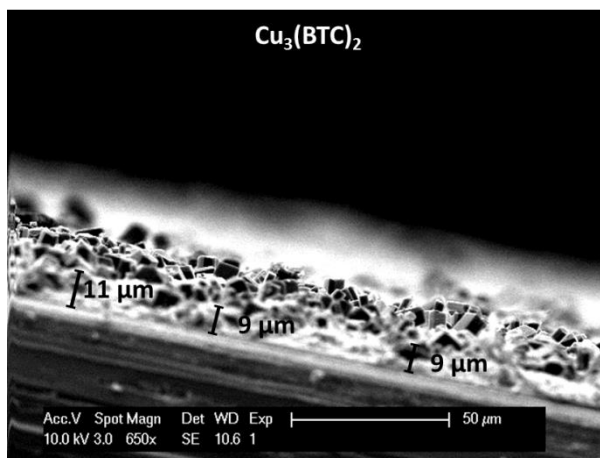

**Figure S4** Cross-section SEM of the  $\text{Cu}_3(\text{BTC})_2$  coating on a copper anode, with a thickness of 9-11 μm

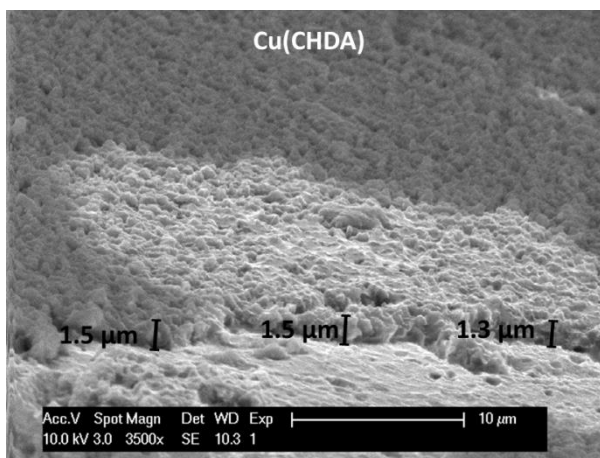

**Figure S5** Cross-section SEM of the  $\text{Cu}(\text{CHDA})$  coating on a copper anode, with a thickness of 1.3-1.5 μm.

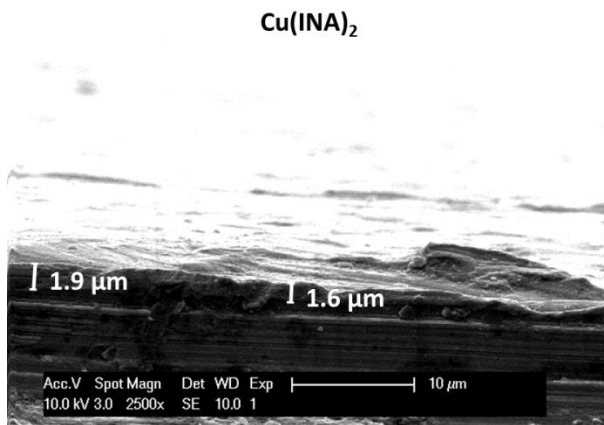

**Figure S6** Cross-section SEM of the  $\text{Cu}(\text{INA})_2$  coating on a copper anode, with a thickness of 1.6-1.9  $\mu\text{m}$ .

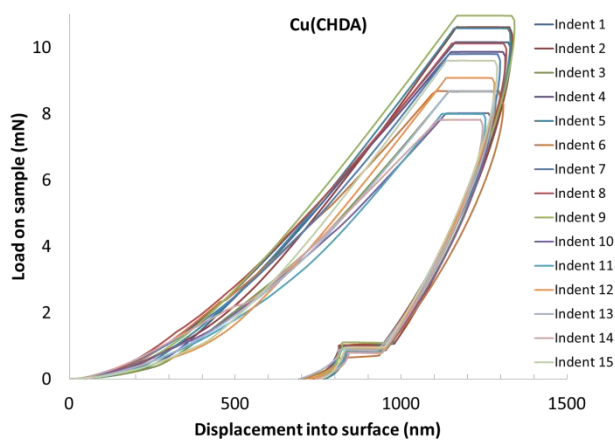

**Figure S7** Load-displacement curves of 15 indents on  $\text{Cu}(\text{CHDA})$ .

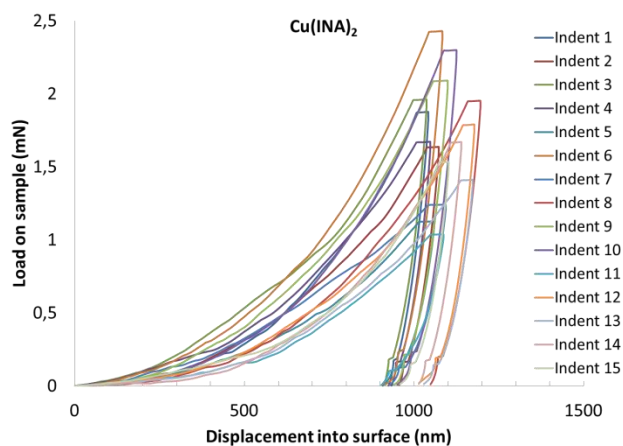

**Figure S8** Load-displacement curves of 15 indents on  $\text{Cu}(\text{INA})_2$ .

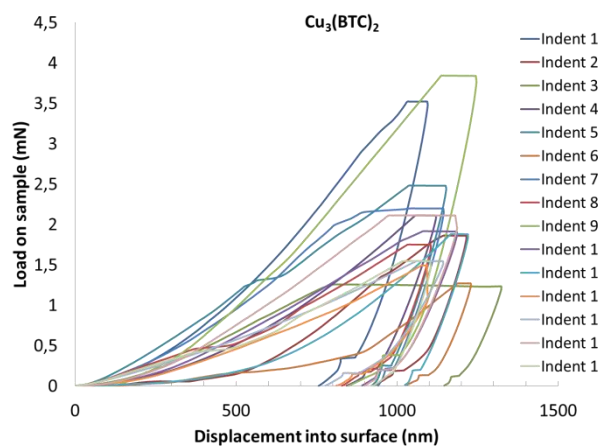

**Figure S9** Load-displacement curves of 15 indents on  $\text{Cu}_3(\text{BTC})_2$ .

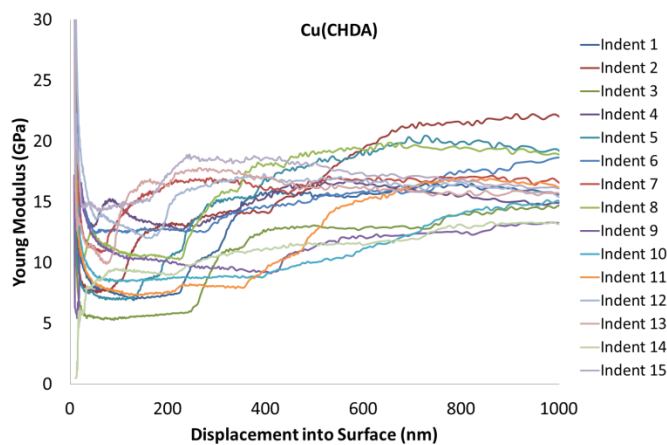

**Figure S10** Young's moduli as a function of indentation depth for 15 indents on  $\text{Cu}(\text{CHDA})$ .

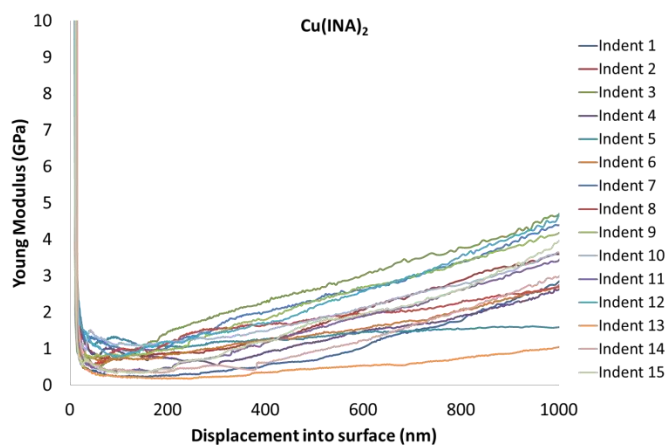

**Figure S11** Young's moduli as a function of indentation depth for 15 indents on  $\text{Cu}(\text{INA})_2$ .

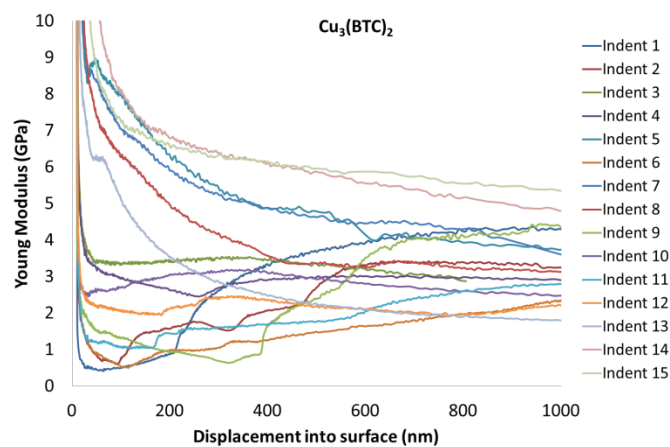

Figure S12 Young's moduli as a function of indentation depth for 15 indents on  $\text{Cu}_3(\text{BTC})_2$ .

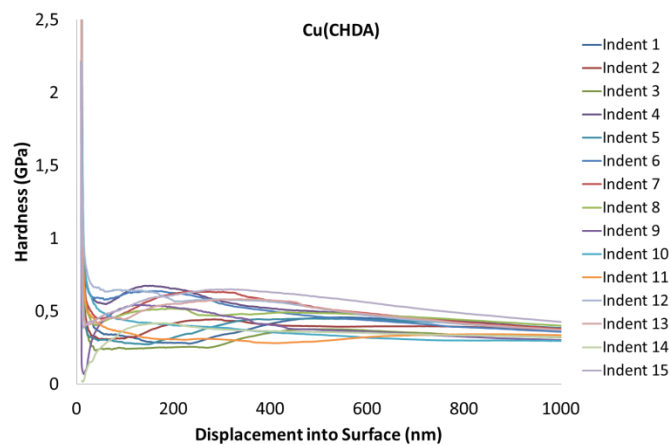

Figure S13 Hardness as a function of indentation depth for 15 indents on  $\text{Cu}(\text{CHDA})$ .

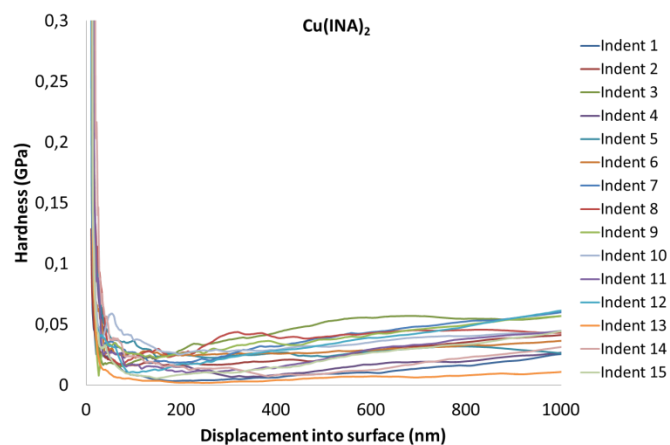

Figure S14 Hardness as a function of indentation depth for 15 indents on  $\text{Cu}(\text{INA})_2$ .

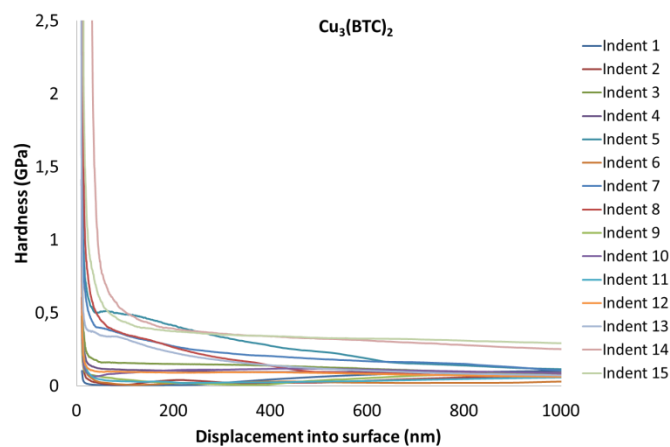

**Figure S15** Hardness as a function of indentation depth for 15 indents on  $\text{Cu}_3(\text{BTC})_2$ .

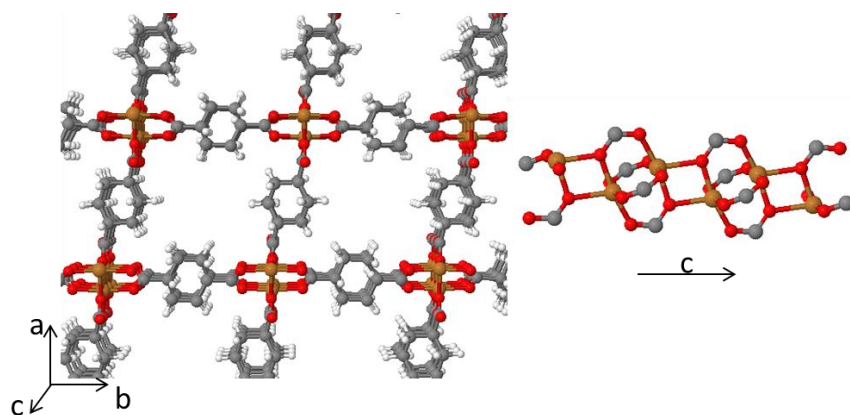

**Figure S16** The structure of  $\text{Cu}(\text{trans-1,4-cyclohexanedicarboxylate})$  with the 1D pores (left), the inorganic Cu-oxo-chain forming the rigid pillar of the structure in the  $c$ -direction (right).

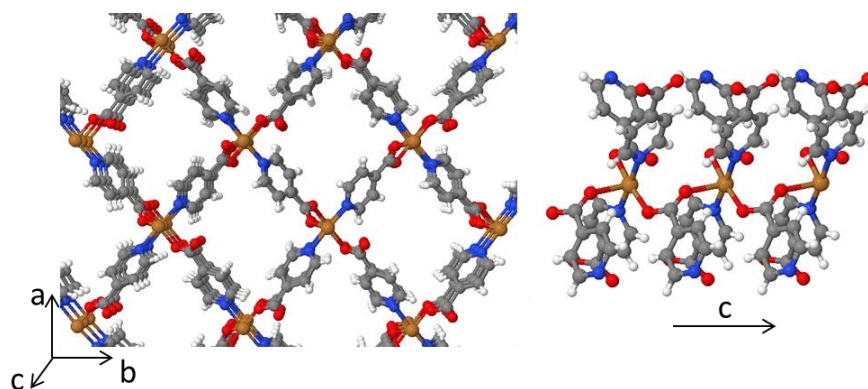

**Figure S17** The structure of  $\text{Cu}(\text{isonicotinate})_2$  with the 1D pores (left), square pyramidal copper atoms coordinated by two pyridyl groups and two carboxylate groups of four isonicotinate units in a monodentate fashion at the equatorial positions, together with one carboxylate of an isonicotinate in apical position (right).

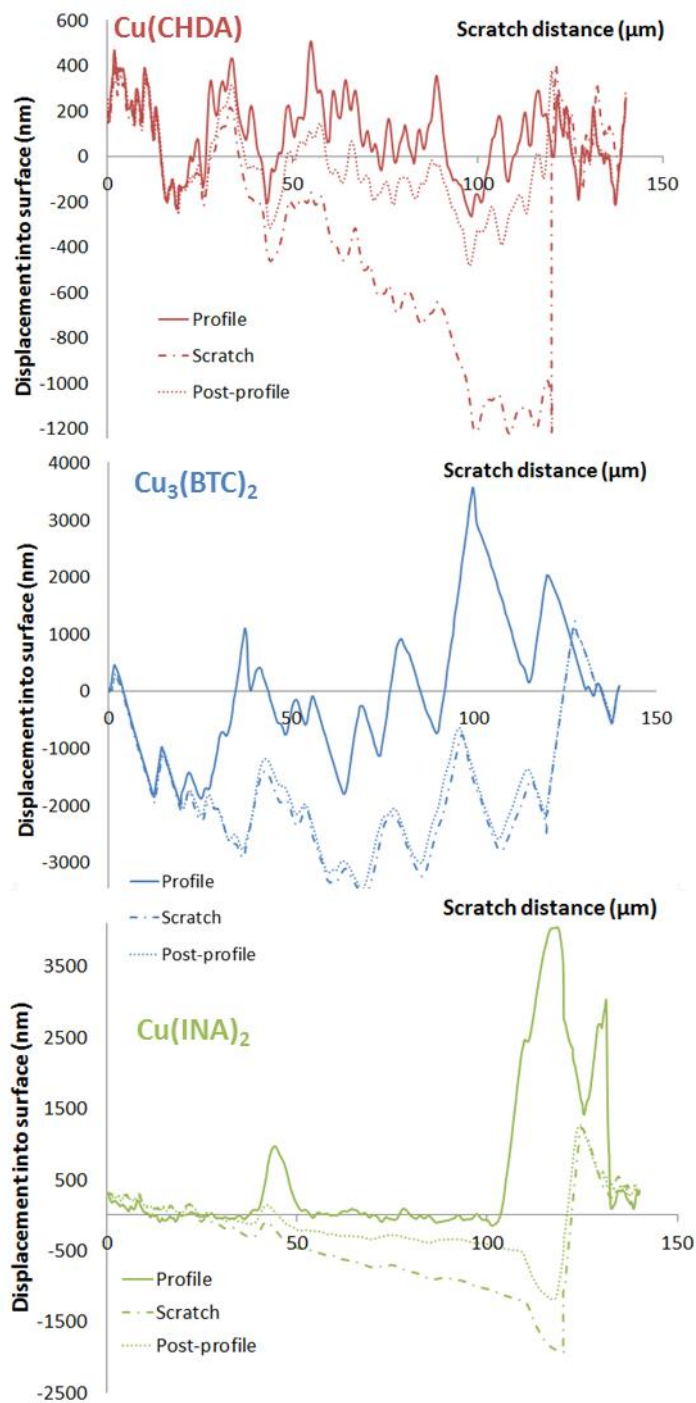

**Figure S18.** Scratch profiles in the push mode with the displacement into the surface as a function of scratch distance. The load was set at 0 mN at 20 μm and linearly increased up to 10 mN at 120 μm

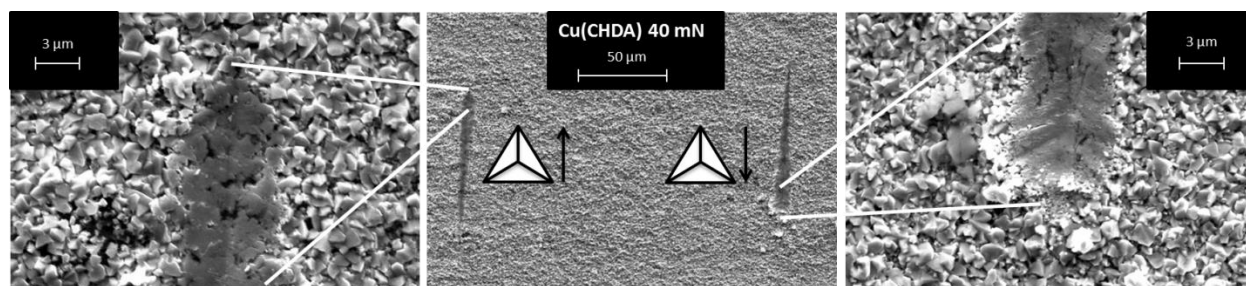

**Figure S19.** Scratch profiles of Cu(CHDA) with a maximum load of 40mN; the side panels show details of the residual scratch.

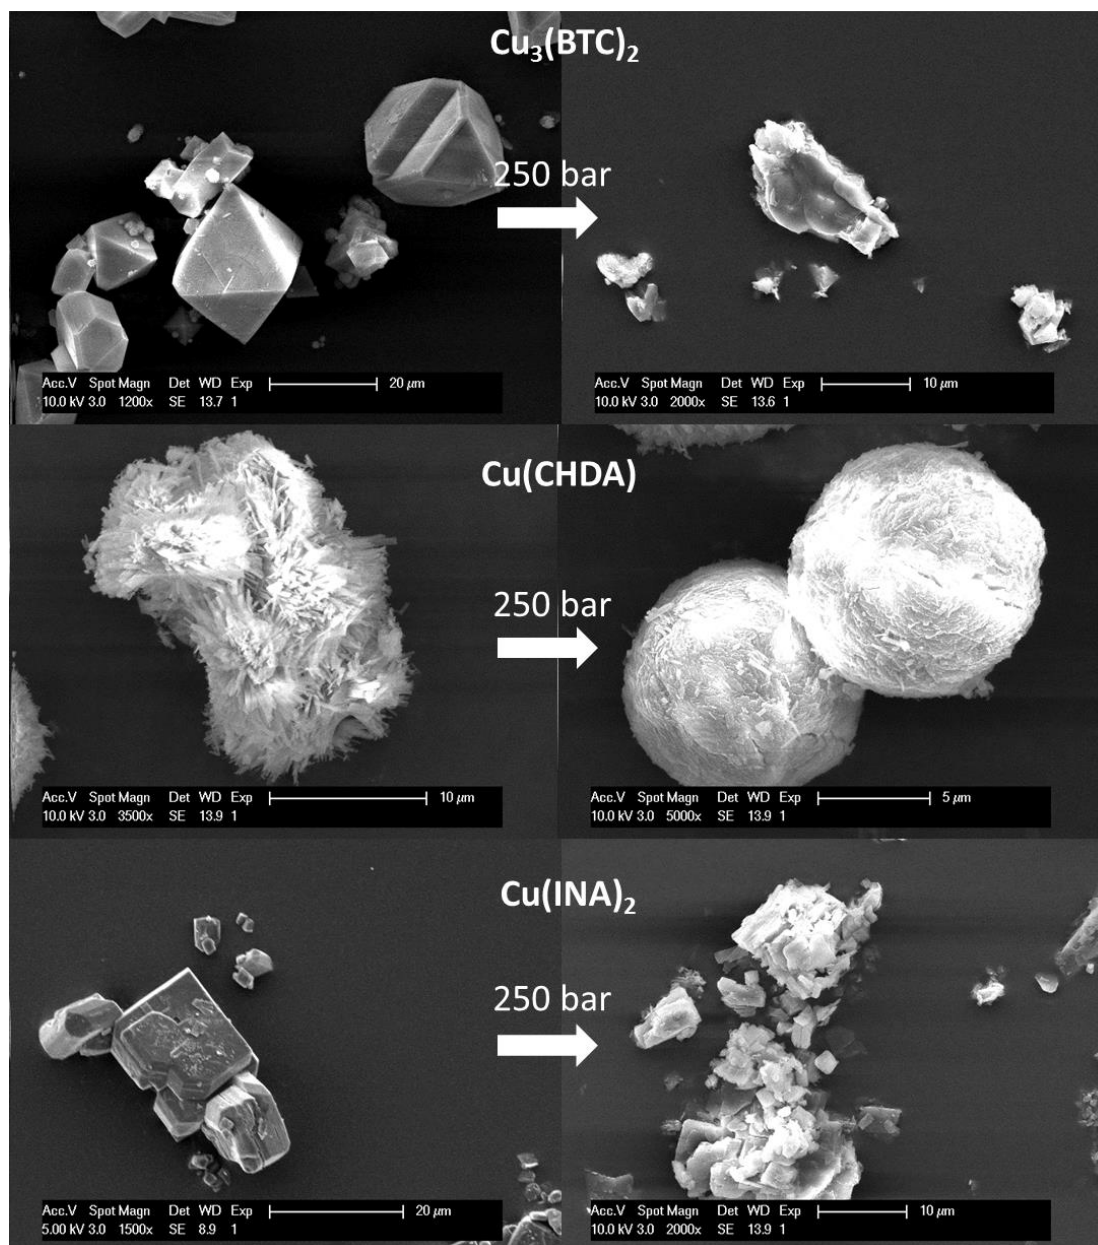

**Figure S20.** SEM pictures of solvothermally synthesised  $\text{Cu}_3(\text{BTC})_2$ , Cu(CHDA) and  $\text{Cu}(\text{INA})_2$ ; before and after 250 bar uniaxial pressure.

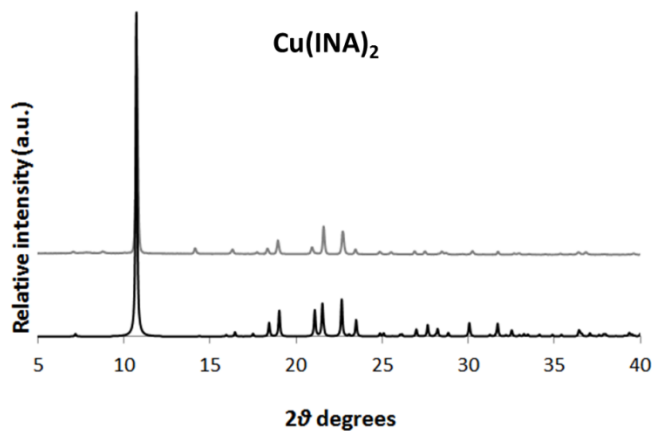

**Figure S21.** Thin film XRD pattern of  $\text{Cu(INA)}_2$  collected from a film grown on a pure copper electrode (top) and reference XRD pattern (bottom).

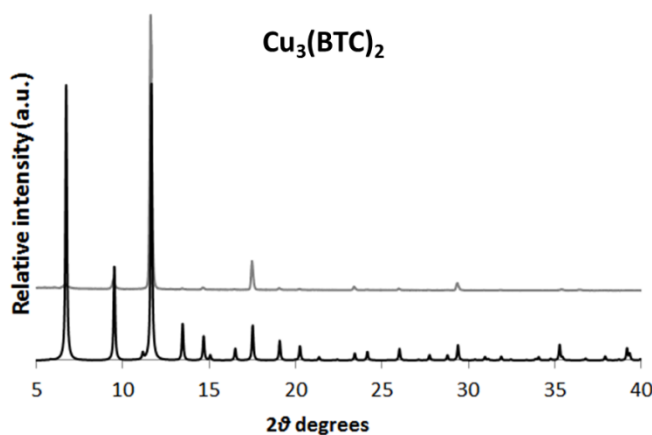

**Figure S22.** Thin film XRD pattern of  $\text{Cu}_3(\text{BTC})_2$  collected from a film grown on a pure copper electrode (top) and reference XRD pattern (bottom).

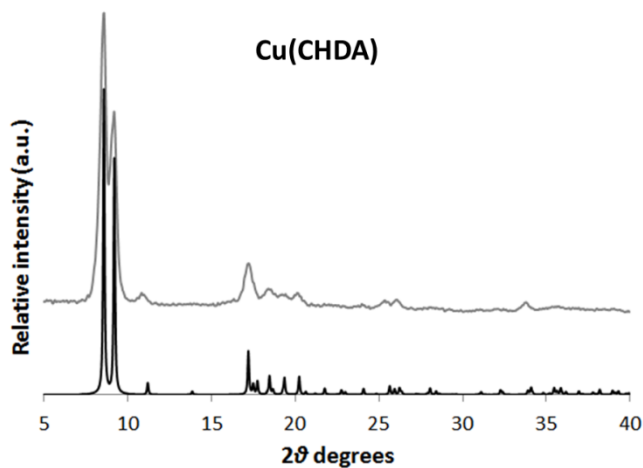

**Figure S23.** Thin film XRD pattern of  $\text{Cu(CHDA)}$  collected from a film grown on a pure copper electrode (top) and reference XRD pattern (bottom).

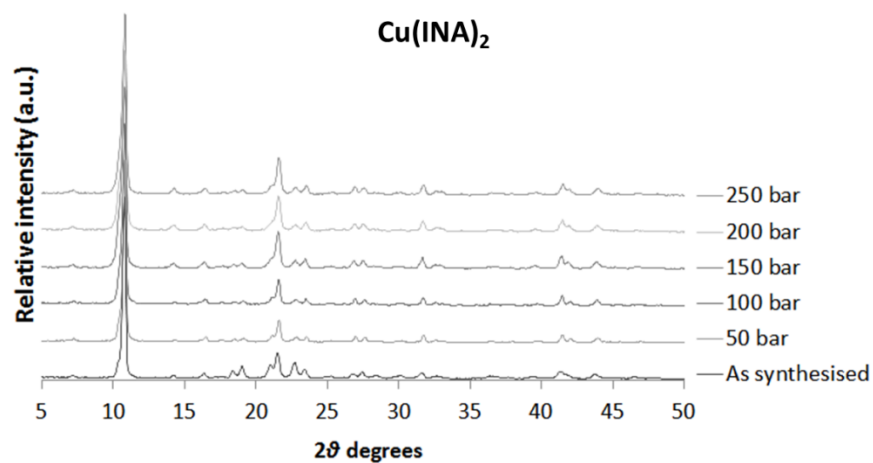

Figure S24. XRD patterns of  $\text{Cu(INA)}_2$  powders before (as synthesised) and after certain applied pressures (X bar).

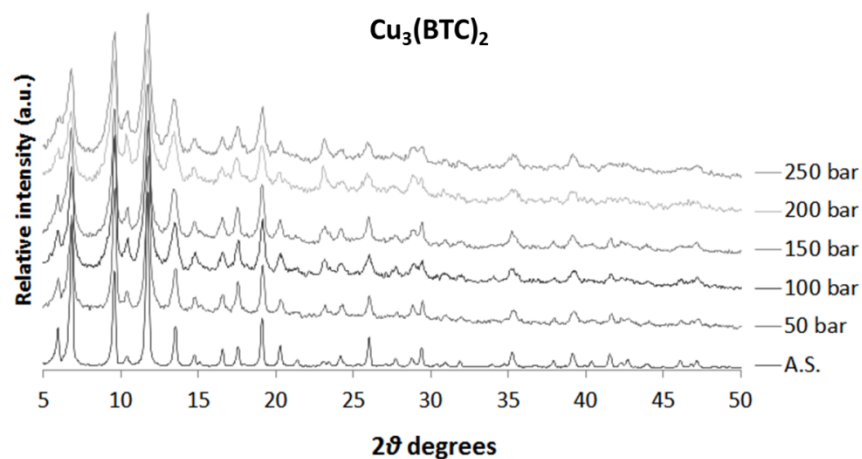

Figure S25. XRD patterns of  $\text{Cu}_3(\text{BTC})_2$  powders before (as synthesised) and after certain applied pressures (X bar).

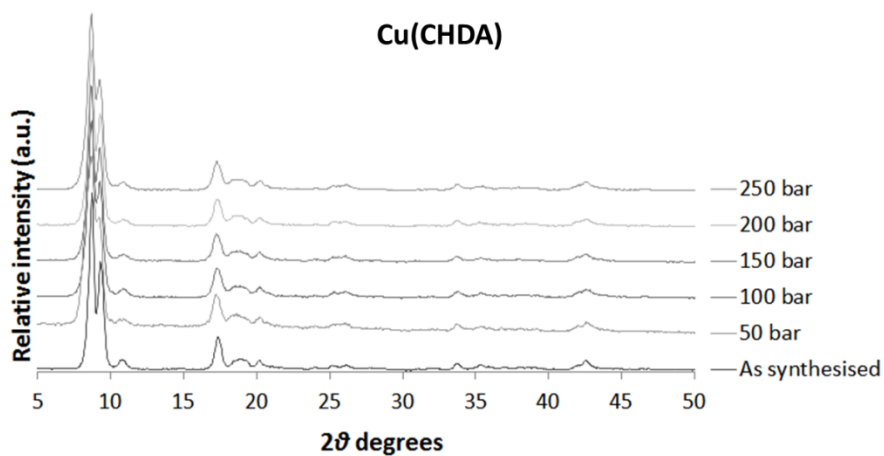

Figure S26. XRD patterns of  $\text{Cu(CHDA)}$  powders before (as synthesised) and after certain applied pressures (X bar).
